# Supplementary material for: Acute Effects of Summer Air Pollution on Pulmonary Function and Airway Inflammation in Healthy Young Women
Source: PubMed Central journal article supplement (PMC4074636; doi:10.2188/jea.je20130155), 2014-07-05
Supplement: je-24-312-s001.pdf [file je-24-312-s001.pdf]

**eTable 1.** Estimated changes and 95% CIs in the respiratory function test results per 10- $\mu\text{g}/\text{m}^3$  or 10-ppb increase in each pollutant during the study period among the 17 subjects who lived less than 5 km from monitoring stations

|                            | EBC pH |                |         | log FeNO |               |         | PEF (L/min) |                 |         | FEV <sub>1</sub> (L) |               |         |
|----------------------------|--------|----------------|---------|----------|---------------|---------|-------------|-----------------|---------|----------------------|---------------|---------|
|                            | Change | 95% CI         | P Value | Change   | 95% CI        | P Value | Change      | 95% CI          | P Value | Change               | 95% CI        | P Value |
| <b>O<sub>3</sub></b>       |        |                |         |          |               |         |             |                 |         |                      |               |         |
| Test day <sup>a</sup>      | -0.02  | (-0.04, 0.00)  | 0.042   | 0.01     | (-0.07, 0.08) | 0.836   | -4.64       | (-10.33, 1.06)  | 0.111   | -0.03                | (-0.08, 0.02) | 0.197   |
| Previous day <sup>b</sup>  | -0.03  | (-0.06, 0.01)  | 0.118   | 0.09     | (-0.12, 0.30) | 0.416   | -4.87       | (-17.64, 7.90)  | 0.455   | -0.04                | (-0.21, 0.14) | 0.678   |
| 2-day average <sup>c</sup> | -0.03  | (-0.06, 0.00)  | 0.044   | 0.02     | (-0.10, 0.14) | 0.688   | -5.58       | (-13.36, 2.21)  | 0.160   | -0.04                | (-0.12, 0.05) | 0.383   |
| 3-day average <sup>d</sup> | -0.04  | (-0.08, -0.01) | 0.026   | 0.02     | (-0.13, 0.17) | 0.759   | -3.63       | (-11.40, 4.14)  | 0.360   | -0.03                | (-0.14, 0.07) | 0.540   |
| 4-day average <sup>d</sup> | -0.05  | (-0.10, -0.01) | 0.027   | 0.00     | (-0.21, 0.21) | 0.985   | -0.15       | (-10.93, 10.62) | 0.978   | -0.02                | (-0.15, 0.11) | 0.755   |
| 5-day average <sup>d</sup> | -0.05  | (-0.09, 0.00)  | 0.058   | -0.04    | (-0.26, 0.17) | 0.711   | 6.58        | (-7.16, 20.33)  | 0.348   | 0.01                 | (-0.12, 0.15) | 0.871   |
| <b>NO<sub>2</sub></b>      |        |                |         |          |               |         |             |                 |         |                      |               |         |
| Test day <sup>a</sup>      | -0.01  | (-0.05, 0.02)  | 0.395   | -0.16    | (-0.40, 0.08) | 0.192   | -0.75       | (-17.35, 15.86) | 0.930   | 0.08                 | (-0.09, 0.25) | 0.350   |
| Previous day <sup>b</sup>  | 0.01   | (-0.02, 0.04)  | 0.560   | -0.06    | (-0.29, 0.16) | 0.581   | -10.01      | (-25.94, 5.91)  | 0.218   | 0.07                 | (-0.09, 0.23) | 0.396   |
| 2-day average <sup>c</sup> | 0.00   | (-0.03, 0.03)  | 0.945   | -0.11    | (-0.36, 0.13) | 0.376   | -6.28       | (-23.45, 10.89) | 0.473   | 0.08                 | (-0.09, 0.25) | 0.357   |
| 3-day average <sup>d</sup> | 0.00   | (-0.04, 0.03)  | 0.966   | -0.12    | (-0.42, 0.18) | 0.428   | -7.74       | (-27.70, 12.22) | 0.447   | 0.11                 | (-0.11, 0.32) | 0.329   |
| 4-day average <sup>d</sup> | 0.01   | (-0.03, 0.05)  | 0.683   | -0.22    | (-0.59, 0.15) | 0.237   | 3.48        | (-18.10, 25.07) | 0.752   | 0.18                 | (-0.06, 0.43) | 0.148   |
| 5-day average <sup>d</sup> | 0.02   | (-0.03, 0.07)  | 0.393   | -0.34    | (-0.76, 0.09) | 0.119   | 12.11       | (-9.88, 34.09)  | 0.281   | 0.25                 | (-0.03, 0.52) | 0.085   |
| <b>SPM</b>                 |        |                |         |          |               |         |             |                 |         |                      |               |         |
| Test day <sup>a</sup>      | -0.02  | (-0.03, 0.00)  | 0.019   | -0.02    | (-0.08, 0.05) | 0.612   | -0.03       | (-7.92, 7.87)   | 0.995   | -0.04                | (-0.09, 0.01) | 0.118   |
| Previous day <sup>b</sup>  | -0.04  | (-0.08, -0.01) | 0.008   | 0.05     | (-0.08, 0.18) | 0.460   | -3.66       | (-17.09, 9.77)  | 0.594   | -0.08                | (-0.17, 0.02) | 0.112   |
| 2-day average <sup>c</sup> | -0.03  | (-0.05, -0.01) | 0.008   | -0.01    | (-0.08, 0.07) | 0.868   | -0.96       | (-10.73, 8.82)  | 0.848   | -0.05                | (-0.11, 0.02) | 0.149   |
| 3-day average <sup>d</sup> | -0.05  | (-0.08, -0.01) | 0.004   | 0.01     | (-0.11, 0.13) | 0.857   | 0.59        | (-13.35, 14.52) | 0.934   | -0.08                | (-0.18, 0.01) | 0.091   |
| 4-day average <sup>d</sup> | -0.06  | (-0.11, -0.01) | 0.021   | -0.01    | (-0.19, 0.16) | 0.870   | 10.13       | (-10.19, 30.46) | 0.328   | -0.12                | (-0.30, 0.07) | 0.206   |
| 5-day average <sup>d</sup> | -0.05  | (-0.10, 0.00)  | 0.064   | -0.06    | (-0.24, 0.13) | 0.547   | 17.89       | (-3.62, 39.40)  | 0.103   | -0.09                | (-0.30, 0.13) | 0.448   |

CI = confidence interval, O<sub>3</sub> = ozone, NO<sub>2</sub> = nitrogen dioxide, SPM = suspended particulate matter

<sup>a</sup> Test day: The 24-hour mean concentration of a pollutant collected on the day that respiratory function tests were done.

<sup>b</sup> Previous day: The 24-hour mean concentration of a pollutant collected on the day before the respiratory function tests were done.

<sup>c</sup> 2-day average: The mean concentration of a pollutant collected on the day and the day before the respiratory function tests were done.

<sup>d</sup> 3- to 5-day average: The mean concentration of a pollutant collected on the day and the 2 to 4 days before the respiratory function tests were done.

All models are adjusted for temperature and relative humidity.
